# Supplementary material for: Coffee Consumption and Risk of Cardiovascular Diseases and All-Cause Mortality Among Men With Type 2 Diabetes
Source: Oxford University Press journal article supplement (doi:10.2337/dc08-2251), 2009-02-19
Supplement: dc082251-sup-online_appendixl.doc [file dc082251-sup-online_appendixl.doc]

**Supplemental tables**

**Table A**1 Subgroup Analyses of Relative Risks for Cardiovascular Events according to Caffeinated Coffee Consumption (1986-2004)

|  |  | Relative Risks according to Caffeinated Coffee Consumption  (95%CI)* | | | |  |  |
| --- | --- | --- | --- | --- | --- | --- | --- |
| Variable | Cases, n | < 1  cup/mon | 1 cup/mon  to 4 cups/wk | 5 to 7  cups/wk | ≥ 2  cups/d | *P* for Trend | *P* for  interaction |
| Body mass index |  |  |  |  |  |  |  |
| < 25 kg/m2 | 151 | 1.0 | 0.46 (0.22-0.96) | 1.18 (0.68-2.05) | 0.47 (0.23-0.97) | 0.26 |  |
| ≥ 25 kg/m2 | 284 | 1.0 | 0.90 (0.59-1.40) | 0.82 (0.54-1.24) | 0.83 (0.54-1.27) | 0.46 | 0.17 |
| Smoking |  |  |  |  |  |  |  |
| No | 198 | 1.0 | 1.19 (0.65-2.18) | 1.24 (0.70-2.19) | 0.86 (0.44-1.66) | 0.55 |  |
| Yes | 237 | 1.0 | 0.69 (0.44-1.09) | 0.88 (0.59-1.33) | 0.72 (0.46-1.13) | 0.42 | 0.94 |
| Parental history of MI |  |  |  |  |  |  |  |
| No | 270 | 1.0 | 0.73 (0.45-1.19) | 0.89 (0.58-1.36) | 0.62 (0.39-1.00) | 0.11 |  |
| Yes | 165 | 1.0 | 0.72 (0.40-1.29) | 1.07 (0.63-1.80) | 0.73 (0.41-1.32) | 0.61 | 0.42 |
| History of hypertension |  |  |  |  |  |  |  |
| No | 218 | 1.0 | 0.80 (0.45-1.42) | 1.10 (0.66-1.82) | 0.66 (0.38-1.15) | 0.22 |  |
| Yes | 217 | 1.0 | 0.78 (0.48-1.25) | 0.88 (057-1.36) | 0.76 (0.47-1.23) | 0.46 | 0.68 |
| Duration of diabetes |  |  |  |  |  |  |  |
| ≤ 5 years | 257 | 1.0 | 0.83 (0.53-1.32) | 1.03 (0.69-1.55) | 0.86 (0.56-1.34) | 0.72 |  |
| > 5 years | 178 | 1.0 | 0.62 (0.33-1.15) | 0.76 (0.43-1.34) | 0.47 (0.24-0.90) | 0.08 | 0.68 |
| Aspirin use |  |  |  |  |  |  |  |
| No | 245 | 1.0 | 0.51 (0.29-0.91) | 0.89 (0.57-1.41) | 0.84 (0.52-1.35) | 0.80 |  |
| Yes | 190 | 1.0 | 1.05 (0.63-1.74) | 1.01 (0.63-1.63) | 0.53 (0.30-0.95) | 0.02 | 0.08 |

* Adjusted for: age (5-year categories), smoking status (never, past, and current 1-14, ≥15 cigarettes/day), BMI (<23.0, 23.0-24.9, 25.0-29.9, or ≥ 30.0 kg/m2), alcohol intake (0, 0.1-4.9, 5.0-14.9, ≥15 g/d), parental history of MI, history of hypertension, hypercholesterolemia, physical activities (quintiles of metabolic equivalents spent weekly), duration of diabetes (<5, 5-10, ≥10 y), hypoglycemic medication, and dietary factors, including total energy intake, multivitamin use and vitamin E supplement use, intake of polyunsaturated, saturated, and trans fat, long-chain omega-3 fatty acids, cereal fiber, and folate, and glycemic load (all in quintiles), categories of decaffeinated coffee and tea consumption, except for the stratification variable.
